# Supplementary material for: Influence of Japanese Namban Lacquer in New Spain, Focusing on Enconchado Furniture
Source: MDPI journal article supplement (doi:10.3390/heritage7030071), 2024-03-11
Supplement: s1 [file s1]

## Article

# Influencia de la laca japonesa Namban en Nueva España: con enfoque en el mueble enconchado

Yayoi Kawamura <sup>1,\*</sup> and Ana García Barrios <sup>2</sup>

<sup>1</sup> Departamento de Historia del Arte y Musicología, Campus de Humanidades, Universidad de Oviedo, c/Amparo Pedregal s/n, 33011 Oviedo, España

<sup>2</sup> Departamento de Artes y Humanidades. Edificio Maestro Rodrigo C/Infantas, Edificio Maestro Rodrigo C/Infantas, 55, 28300 Madrid, España; ana.barrios@urjc.es

\* Correspondence: kawamura@uniovi.es

**Resumen:** El presente trabajo estudia una creación artística que se produjo en el virreinato novohispano durante la segunda mitad del siglo XVII y principios del siguiente. Se trata de un tipo de mueble en el que se aplica la técnica del enconchado, sobre el cual se indagan los influjos de la laca Namban así como la relación con la pintura enconchada, más conocida y estudiada, y también con la laca mexicana maque. La localización y el estudio de tres muebles elaborados con la técnica de enconchado y una cruz, probablemente de maque, contribuyen a ofrecer una visión complementaria al arte del enconchado, y a tratar el mueble enconchado como género artístico independiente.

**Palabras claves:** estilo Namban; laca; maque; Enconchado mueble; Nueva España; Puerto de Santa María; Alba de Tormes

## 1. Introducción

En la actualidad el estudio del arte enconchado se centra en la pintura, que pueden ser tablas individuales o en forma de biombo. Sobre la superficie de madera, entelada o no, con una base de yeso, se adhieren abundantes fragmentos de nácar y se pintan distintas escenas con óleo y temple. Si tenemos en cuenta la capacidad de absorber y apropiar las influencias foráneas y fusionarlas con la tradición autóctona como una de las más destacadas características del arte virreinal novohispano, la pintura enconchada es un buen ejemplo de ello. La larga tradición del arte de nácar americano, las técnicas pictóricas de España y la laca de Asia se unieron para crear un vistoso género pictórico. Especialmente son famosas las series *La conquista de México* elaboradas en las últimas décadas del siglo XVII en el taller de los González y su círculo en la Ciudad de México. La reciente exposición *La luz del nácar* organizada en el Museo de América de Madrid<sup>i</sup> ha reunido varias, incluso la serie procedente de los duques de Moctezuma, y analiza el arte del enconchado desde el punto de vista de los influjos asiáticos. Sobre la pintura enconchada y su paralelismo con la laca japonesa de estilo Namban existen estudios previos [1-3]. El presente trabajo tiene el enfoque en el mueble enconchado, y analiza este género en comparación con las obras de la laca Namban y del maque mexicano. La metodología aplicada es un estudio comparativo de los materiales, técnicas y formas.

## 2. La llegada de la laca japonesa a Nueva España

Para confirmar los influjos de la laca japonesa en Nueva España, en primer lugar, recopilamos los testimonios documentales de su recepción en la que el galeón de Manila tuvo un papel primordial.

Desde que España y Japón iniciaron contactos a finales del siglo XVI, la laca japonesa *urushi* fue uno de los objetos considerados como de valor, y fue elegido como regalo diplomático. Felipe II recibió en 1584 [4] tres objetos lacados, ahora perdidos, de mano de

tres jóvenes japoneses cristianos que le visitaron, conocidos con el nombre de Legación Tensho, organizada por los jesuitas. Aparte, el mismo monarca poseía varias piezas lacadas consideradas como la laca de estilo Namban (de aquí en adelante laca Namban) [5].

Cuando Tokugawa Ieyasu (1543-1616), futuro gobernante supremo de Japón, inició el contacto con España a través de Manila a finales del siglo XVI, las obras de la laca *urushi* estaban consideradas como mercancía apta para enviar a la capital filipina, ya que figuran en la lista de la mercancía que transportó su embajador en 1599, catorce cajones, cuarenta y cinco cajas para espejos y dos muebles de tocador de “barniz dorado” [6] (pp. 37-38) – claramente objetos lacados y decorado con la técnica de *makie*—. Como consecuencia del éxito de la laca japonesa entre los primeros europeos que contactaron con Japón –portugueses y españoles—, había surgido en las últimas décadas del siglo XVI en ese país una nueva tipología específica para la exportación europea, llamada la laca Namban, cuestión estudiada por diferentes investigadores [7-14]. Se trataban de unos muebles de estilo y de uso occidental decorados profusamente con el dorado de *makie* y nácar, elaborados entre 1580 y 1630 aproximadamente (Figura 1). El interés por este género artístico en Manila y en Nueva España entre los españoles y criollos se aprecia claramente en varios escritos de la época.

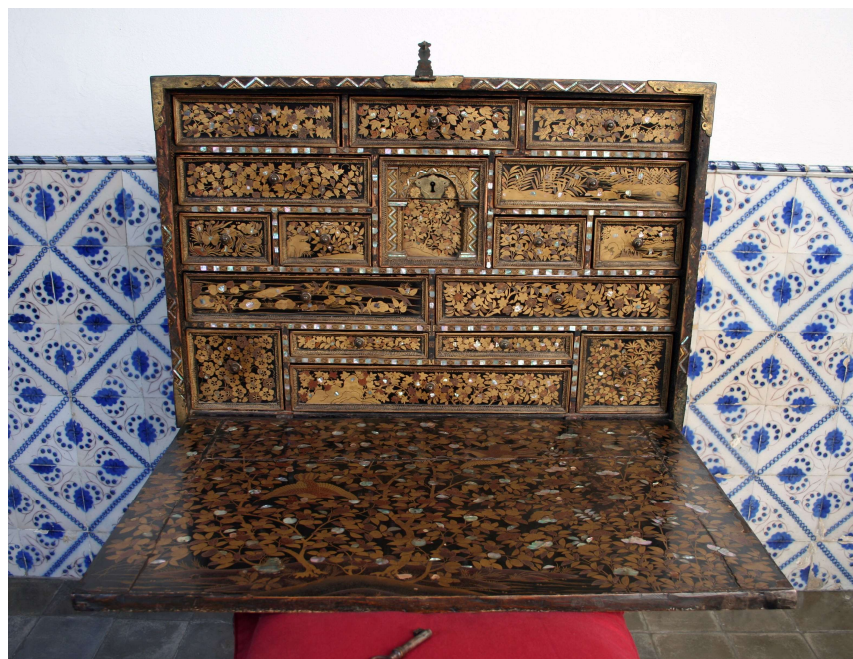

**Figura 1.** Escritorio del Convento de Santa María de Jesús, Sevilla, laca Namban, 1580-1630. Fotografía de Y. Kawamura.

Antonio de Morga (Sevilla, 1559-Quito, 1636), teniente gobernador y capitán general de Filipinas entre 1595 y 1603, hace mención en *Sucesos de las Islas Filipinas* de las mercancías que llegaban procedentes del puerto de Nagasaki y dice: “escritorillos, cajas y cajuelas de maderas con barniz y labores curiosas [...] sirve para cargazones a la Nueva España” [15].

Pocos años después, el gobernador Rodrigo de Vivero (México, 1564-Orizaba, 1636) que conoció Japón por haber naufragado en su costa, escribió en *Relación de Japón* sobre las mercancías japonesas de lujo enviadas a Nueva España: “el Japón no tiene retorno de géneros útiles a la Nueva España, porque pinturas, escritorios, biombos y lo que otra vez se trajo, no es mercaduría para ordinarios [...] El barniz de los escritorios y bufetes, que es como resina de un árbol, no se sabe otro que le iguale, y así tienen lindezas peregrinas de este género” [16].

El navegante y explorador español Sebastián Vizcaino (1548-1628) que estuvo en Japón entre 1611 y 1612 nos dejó la declaración siguiente: “algunos hidalgos de México, que le habían encargado de *maqui* para el regalo de sus casas y la suya” [17] (p. 380) [18] (p. 72). El “*maqui*” que hablaba Vizcaino era, con toda seguridad, la laca. La palabra derivaba del japonés *makie*, técnica de decoración dorada de la laca y casi sinónimo del arte de la laca japonesa.

Por otro lado, el oidor de la Audiencia de Manila, Juan Manuel de la Vega, escribió una carta en 1612 dirigida a Juan Ruiz de Contreras, secretario del Real y Supremo Consejo de Indias de Madrid<sup>ii</sup>, en la que hablaba del envío en 1610 de “una escribanía dorada del Xapon con guarnición y llabe de plata” y de otro envío en 1612 de “un escritorio grande dorado con guarniciones y llabe de plata” como regalo de boda. La carta nos revela que el oidor de Manila eligió como regalo a su superior un objeto de laca Namban.

Lucas de Bergara Gaviria, militar que ascendió de capitán a maestre de campo en 1611 en Filipinas por defender la isla de Ternate ante los ataques holandeses, probablemente para celebrar su promoción, envió a su pueblo natal, Pedroso (La Rioja), un arca, dos atriles y tres hostiarios de laca Namban<sup>iii</sup>, de los cuales el arca aún se conserva en buen estado.

El gobernador de Filipinas Alonso Fajardo, fallecido durante su cargo en 1624, poseía, según su inventario *post mortem*, varios objetos de Japón, entre los cuales había diecinueve piezas considerables como laca Namban: atriles, bufetes, escribanías, cajitas y camas [19].

Estas evidencias documentales datadas en el primer cuarto del siglo XVII, por lo tanto, coincidentes con el periodo de la elaboración de la laca Namban, hablan claramente del aprecio hacia las obras lacadas procedentes de Japón en Manila y en Nueva España, ambos unidos por el galeón de Manila [20, 21, 22].

Las obras de laca Namban conservadas en México en la actualidad no son muchas, probablemente bastantes piezas fueron vendidas fuera del país. Las que creemos que se conservan desde la época novohispana son un hostiario de la Basílica de Guadalupe (Figura 2), una arqueta y dos escritorios de colecciones particulares. Sin embargo, en España se encuentran un número notable de ellas que consideramos que llegaron a través de Nueva España [23]: unas respaldadas documentalmente y otras por llevar piezas de plata americanas añadidas (Figura 3). Otras piezas, especialmente altares portátiles, localizados en distintos museos y colecciones del mundo, llevan en sus interiores pinturas novohispanas (Figura 4), claro indicio de que estuvieron en Nueva España <sup>iv</sup>.

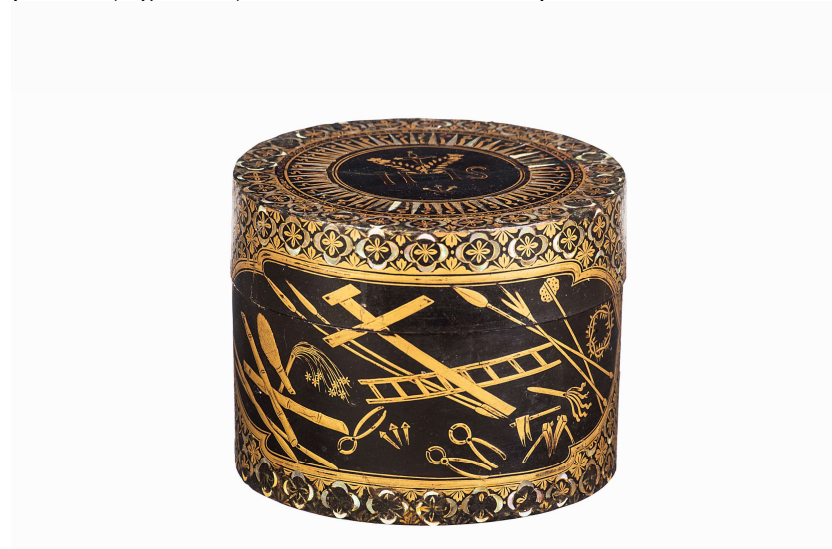

**Figura 2.** Hostiario del Museo de la Basílica de Guadalupe, Ciudad de México, laca Namban, 1580-1630. Fotografía de Luis Fauvet.



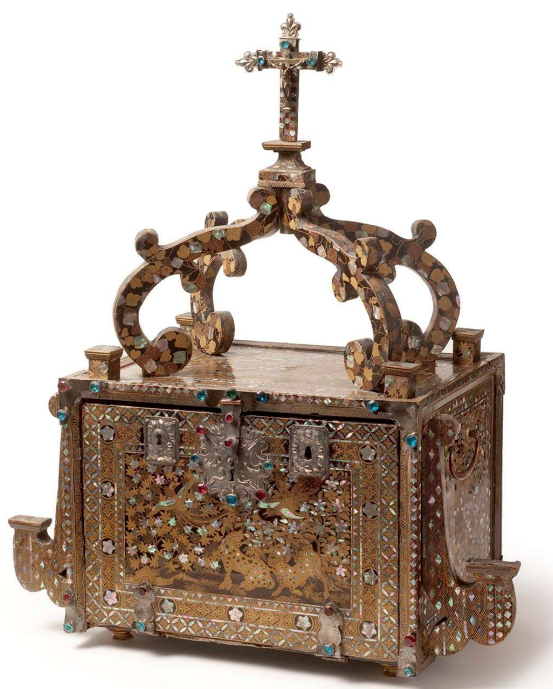

**Figura 3.** Escritorio convertido en sagrario del Convento de San Juan de la Penitencia, Alcalá de Henares (Madrid), laca Namban, 1580-1630. Fotografía de Rafael Suárez Pascual.

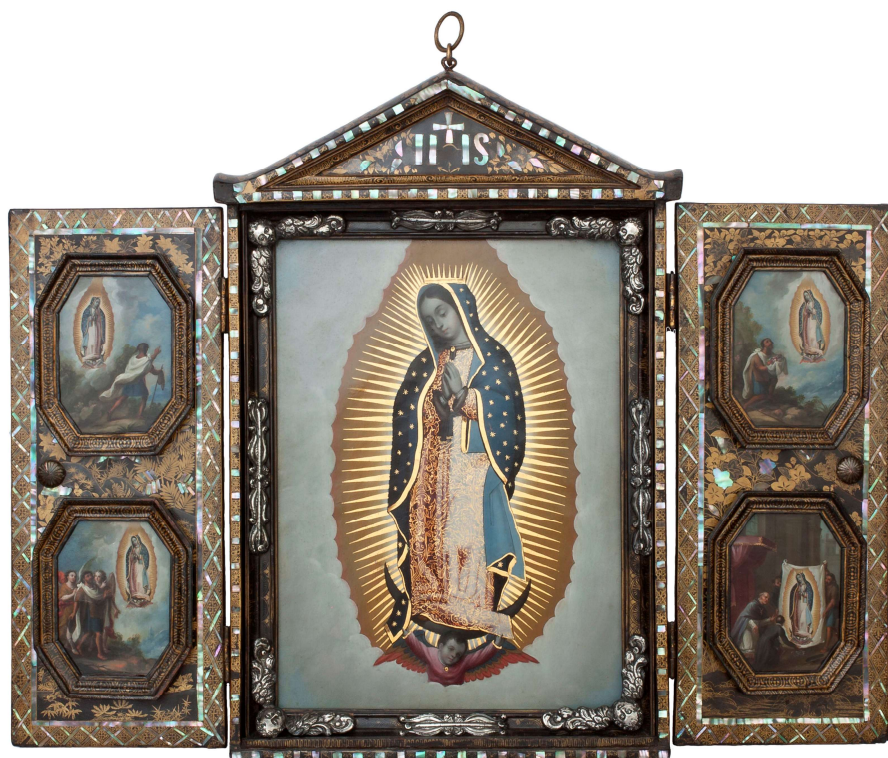

**Figura 4.** Altar portátil de la Fundación Cultural Daniel Liebsohn, Ciudad de México, laca Namban, 1580-1630. Fotografía de la Fundación Cultural Daniel Liebsohn.



### 3. Influjos de la laca Namban en Nueva España

#### 3.1. Maque y enconchado

Sabemos sobradamente que los biombos japoneses se exportaron en esta misma época de Japón a Nueva España donde fueron ampliamente aceptados y se desarrolló el arte de biombos mexicanos. E incluso el nombre “biombo” procede del japonés “*byōbu*” [24, 25]. El mismo fenómeno debió de suceder en cuanto a la laca Namban.

El primer género artístico que pudo recibir sus influjos es el arte de la laca mexicana, o el maque –palabra derivada de *makie* (técnica decorativa de la laca japonesa que usa polvo metálico, principalmente de oro)—, cuya práctica aplicada en las jícaras o calabazas data del periodo prehispánico [26, 27]. Desde la segunda mitad del siglo XVII, a nuestro modo de ver, se desarrollarían objetos artísticos como arquetas con características similares a los de la laca Namban: densa carga decorativa de motivos vegetales y aves, enmarcadas con franjas formadas con motivos repetitivos. Entre las obras consideradas del siglo siguiente, hay dos obras de laca de Olinalá de técnica de rayado que muestran una reminiscencia de la laca Namban: una arqueta del Museo Franz Mayer (05115) y otra del Museo Nacional del Virreinato depositada en el Museo Regional de Michoacán (54570). Sobre fondo de color naranja, figuran de modo muy tupido motivos vegetales y aves de color rojo con toques blancos y azul verdosos, y se aprecian unas bandas de motivos repetitivos. Todos estos detalles recuerdan la decoración de la laca Namban, aunque el color de fondo no es negro, diferencia muy notoria, pero la laca roja se practicaba en China y en el reino de Ryukyu, cuyas producciones también podían haber llegado a Nueva España. Mientras tanto, el análisis de las referencias documentales de diferentes tipos de las lacas de Asia, México y Europa revela que no fueron exclusivamente conocidas como maque. En algunas veces fueron llamados maque, en otras veces, solo piezas “pintadas”, y en otras veces, muebles “de China”, de “Japón” o “de Michoacán” [20, 21, 22].

El segundo género artístico es la pintura enconchada (Figura 5), que los hermanos Miguel y Juan González<sup>v</sup> llevaron a las cotas más altas en la última década del siglo XVII, pero que decayó súbitamente después [28–32]. Aunque hubo algunas propuestas sobre la procedencia foránea de Miguel González [33] [34] (p. 300), los estudios que han revelado los nombres de sus padres [31, 35, 36] parecen apoyar su origen americano. Según Tovar [32], Tomás González de Villaverde figura en 1689 como “maestro de pintor de maque”, y su hijo Miguel como “oficial de dicho arte de pintura”. Esta descripción de la profesión de ambos nos hace pensar que Tomás pintaba cuadros con el maque, y su hijo Miguel hacía lo mismo, pero sabemos que una década después Miguel y su hermano Juan realizaban la pintura enconchada con óleo y temple. Sin embargo, somos conscientes de que la palabra maque no solo o no siempre refiere a la técnica de la laca mexicana de la raíz precolombina.

Asimismo, estos datos sugieren la presencia de un eslabón desconocido en la evolución de la pintura enconchada. Previamente al pleno desarrollo de la pintura enconchada con óleo y temple, pudo haber la pintura de maque con la laca mexicana y probablemente con nácar. No se conoce o no se conserva ninguna obra de laca mexicana con nácar incrustado. Lo cierto es que el documento de 1689 y las obras conservadas de Miguel González hablan de la cercanía entre el arte del maque y el arte de la pintura enconchada.

Por otro lado, al observar los enconchados de los González, se aprecian los influjos de la laca japonesa de estilo Namban. Ocaña se fijó en las zonas marginales, con los marcos, en las que figuran motivos vegetales y aves de tono amarillento sobre fondo negro, que muestran una gran similitud a los motivos de la laca Namban [2, 3]. Aparte de los motivos señalados por Ocaña, las pinceladas doradas aplicadas en las tablas de los González, a base de fino polvo de oro, algunas encima del nácar, crean un brillante e iridiscente efecto, muy similar al de la laca Namban (Figuras 6 y 7).

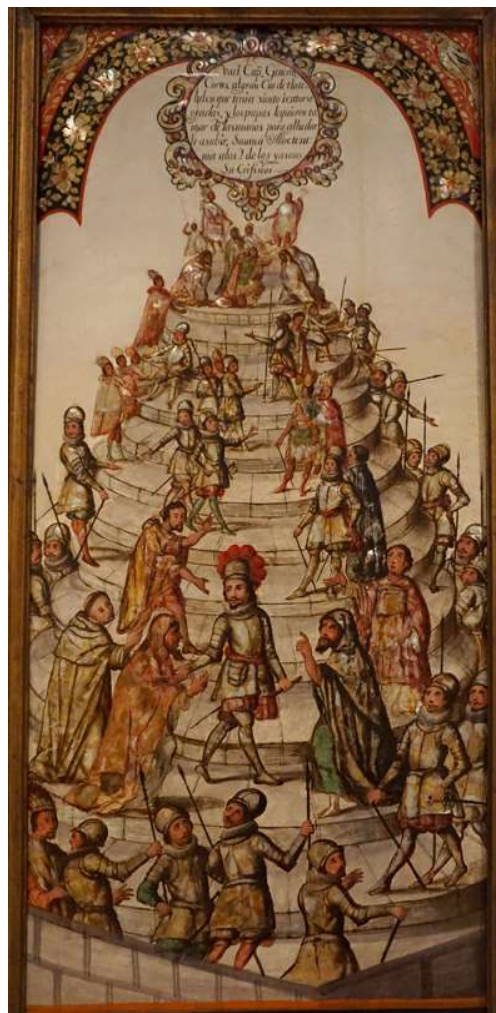

**Figura 5.** *La conquista de México*, procedente de los duques de Moctezuma, colección particular, pintura enconchada, finales del siglo XVII. Fotografía de A. García Barrios.

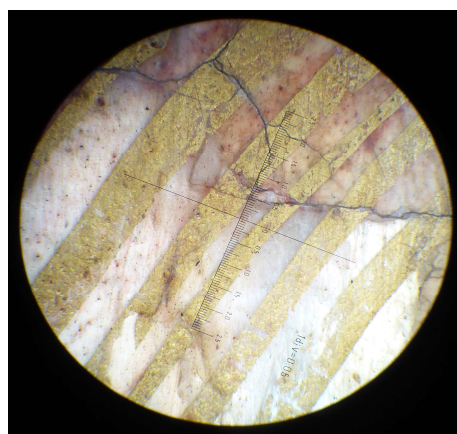

**Figura 6.** Detalle de *La conquista de México*, procedente de los duques de Moctezuma, pintura enconchada, finales del siglo XVII. Fotografía de Y. Kawamura.

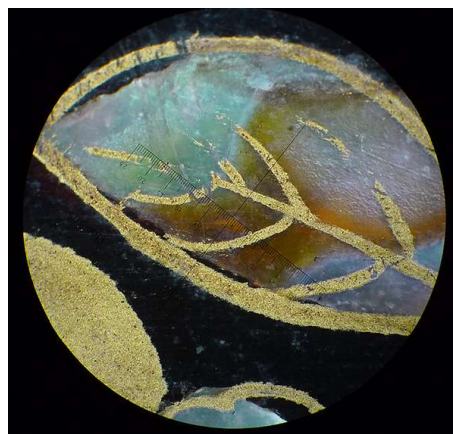

**Figura 7.** Detalle del Arca de la parroquia de Pedroso (La Rioja), laca Namban, 1580-1630. Fotografía de Y. Kawamura.

Otra cercanía entre el taller de los hermanos González y su círculo y el arte japonés la encontramos en las veinticuatro tablas procedentes de los duques de Moctezuma, recientemente estudiadas [34]. En los reversos de estas tablas se desarrolla una pintura de paisaje acuático con aves sobre fondo dorado, de clara herencia de la pintura de los biombos japoneses de la escuela Kano del siglo XVII —quien difundió la iconografía de pájaros y flores (*kachōzu*) y el uso de fondo dorado—, pero pintada por artistas no japoneses (Figura 8). Este es un sorprendente hallazgo, del cual aún no hay una respuesta sobre la autoría, pero que podría insinuar la presencia de pintores de origen japonés, o de segunda generación, afincados en Nueva España como colaboradores en el taller de los González. Esto es una conjetura sin fundamentos documentales hasta el momento, pero que parece razonable.

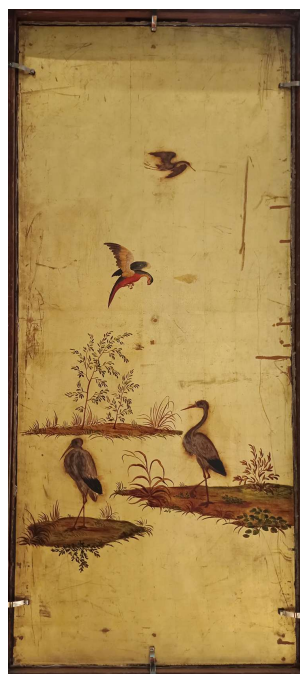

**Figura 8.** Pintura de paisaje, en el reverso de los paneles enconchados de *La conquista de México* procedentes de los duques de Moctezuma. Fotografía de Y. Kawamura.

Creemos estar acertados en situar en torno a mediados del siglo XVII la etapa en la que, tras el gran impacto de los biombos y las lacas de Japón, se inició el proceso de su asimilación y apropiación e incluso la fusión con el arte europeo y el autóctono por parte



de los habilidosos artistas y artesanos de Nueva España, contando quizás con la colaboración de artesanos de origen japonés. Precisamente en este periodo situaríamos el siguiente género, objeto del presente estudio, que es el mueble enconchado.

Actualmente se conocen solo tres objetos que podemos denominar mueble enconchado. Un sagrario que se conserva en la parroquia de Allo (Navarra), un fragmento de un mueble, quizás una pequeña puerta o frente de un cajón, conservado en el Museo de América de Madrid, y un atril del Museo de las Carmelitas de Alba de Tormes (Salamanca).

### 3.2. Sagrario enconchado de Allo

El sagrario de la parroquia de Allo (Navarra) fue reconocido y estudiado como enconchado [35–37], y más tarde fue examinado en comparación con la laca Namban [6] (pp. 98–99) (Figura 9). El modelo del sagrario es un templete hexagonal cupulado, un lejano eco del sagrario de El Escorial diseñado por Juan de Herrera, por lo tanto, puede estar imitando un modelo español que llegó a Nueva España, aunque no debemos de olvidar que hubo la producción de este tipo de sagrario, hexagonal y cupulado, con la laca Namban, como demuestra un ejemplar del Museo Peabody Essex de Salem (Massachusetts) (E76704) [11] (p. 194).

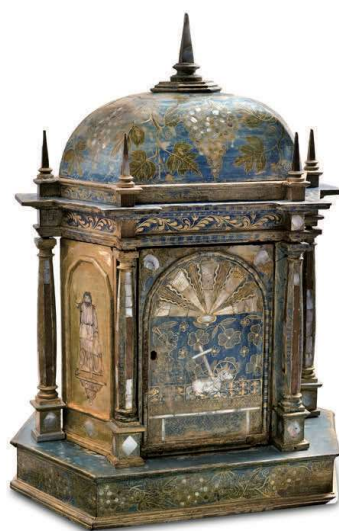

**Figura 9.** Sagrario enconchado de la parroquia de Allo (Navarra), enconchado, siglo XVII avanzado. Fotografía de Larrión&Pimoulier.

Al examinar los detalles, el paralelismo con la laca Namban se detecta aún más. La cúpula está decorada con hojas de vid y racimos de uvas, haciendo referencia a la eucaristía, y en el cuerpo figuran seis arcos con el cordero místico y santos. Aunque el fondo es azul, y no negro como la laca Namban, los motivos están elaborados con finas láminas de nácar recortadas y suave tono amarillento semitransparente, y pinceladas doradas con polvo de oro, que van dibujando las formas, y no se aplican más colores (Figura 10). Un detalle que está asociado directamente con el aspecto del *makie* de la laca japonesa. Las formas y la combinación del nácar y el dorado de las hojas de vid y racimos de uvas son muy similares a los mismos motivos de la laca Namban (Figura 11). Por otra parte, las pinceladas doradas que dibujan los detalles encima de las láminas de nácar en los arcos, que corrigen o disimulan la irregularidad de las formas del nácar adherido [38] (p. 17) [39] (p. 28) es la manera de trabajar que se aprecia en la laca Namban y también en la pintura enconchada. Aparte, en las zonas marginales se observan estrechas bandas con motivos vegetales ondulados similares a los roleos o con motivos repetitivos, que figuran en las

obras de laca Namban. Y el pulido y brillante aspecto que ofrece la obra a cierta distancia nos recuerda claramente el arte de laca Namban.

La fecha de la llegada del sagrario a la parroquia es anterior a 1718 [36], por lo tanto, la posibilidad de su elaboración en la segunda mitad del siglo XVII es aceptable.

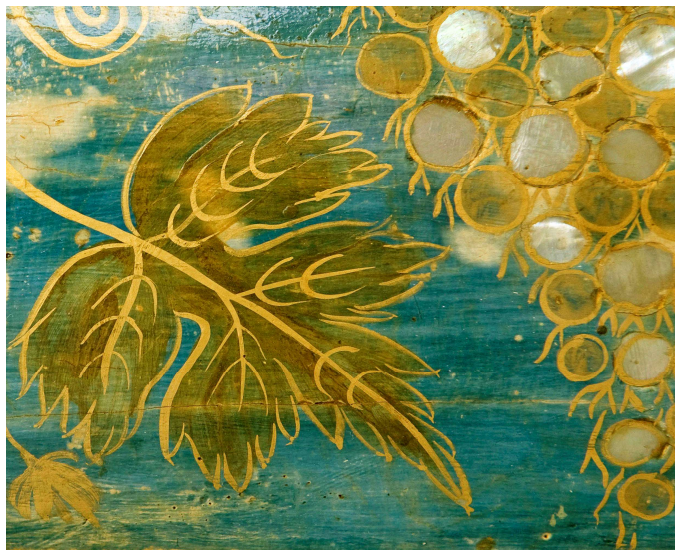

**Figura 10.** Detalle de la cúpula del sagrario anterior. Fotografía de Y. Kawamura.

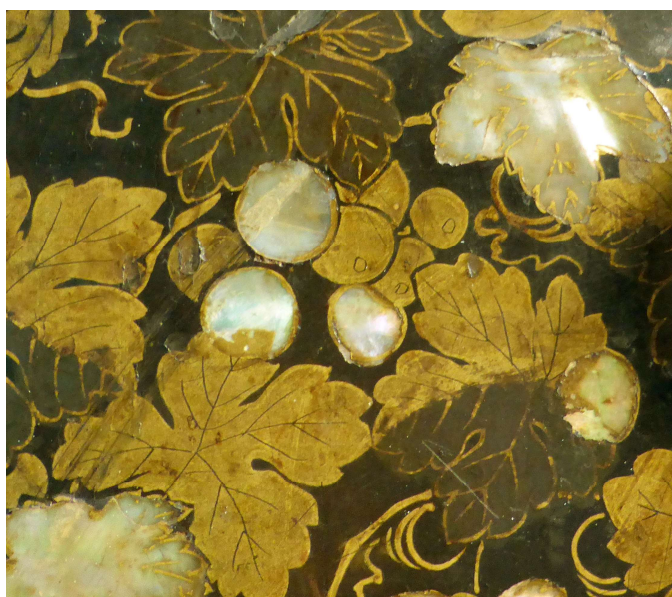

**Figura 11.** Detalle del arca de colección particular, laca Namban, detalle, 1580-1630. Fotografía de Y. Kawamura.

### 2.3. Fragmento de mueble enconchado del Museo de América de Madrid

Un fragmento rectangular procedente de un mueble se conserva en el Museo de América de Madrid (00169) (Figura 12). Figura una escena de Atlas y Vulcano, por lo cual se podría clasificar como pintura enconchada, pero la escena se encuentra dentro de un arco acompañado de columnas, que nos recuerda el cajón central de los escritorios de origen español, que se elaboraron en considerable número con la laca Namban (Figura 1). El fondo negro decorado con ramilletes dorados nos evoca también la laca japonesa, pero debido a la escasez de información y el estado fragmentario actual, no podemos aventurar

más. Incluso no sabemos qué material adhesivo está aplicado ni si la textura lustrosa que muestra es debido a la capa de barniz posterior o al uso del maque.

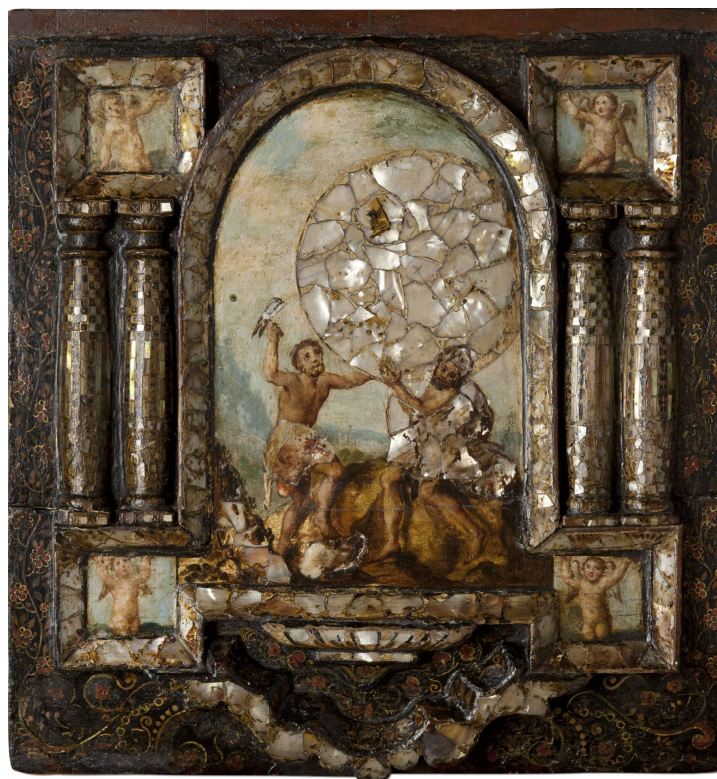

**Figura 12.** Fragmento de mueble del Museo de América de Madrid, enconchado, 1625-1725. © Museo de América de Madrid.

### 3.4. Atril enconchado de Alba de Tormes

El caso del atril enconchado conservado en el Museo Carmelitano de Alba de Tormes (Figura 13) ofrece más consideraciones interesantes con relación a la laca Namban [23]. Fue probablemente elaborado más tempranamente que las dos obras anteriores. Este atril directamente nos remite al atril de laca Namban (Figura 14). La forma del atril es exactamente la misma de la del atril Namban, es decir, de tipo plegable con dos tablas entrecruzadas. A diferencia de las obras anteriormente analizadas, el fondo está tratado con el color negro, como la laca japonesa, y encima están incrustadas varias láminas finas de nácar recortadas en forma de hojas y flores. Aún a falta de un análisis químico, el aspecto lustroso del color negro nos apunta el maque, es decir la grasa extraída del insecto aje (*Coccus axin*) disuelta en el aceite de las semillas de chía (*Salvia hispanica*) y coloreada con el hollín. La combinación cromática del negro, el dorado y el nácar es idéntica. El anagrama IHS (Jesucristo), que figura en gran tamaño en la mayoría de los atriles japoneses también aparece en este. Las flores parecen a las de la camelia, muy frecuentes en la laca Namban, y los extremos curvilíneos de los ramilletes siguen al modelo japonés. Es evidente que el artífice de este atril tuvo como modelo un atril de laca Namban e intentó copiarlo con los materiales y técnicas disponibles en Nueva España.



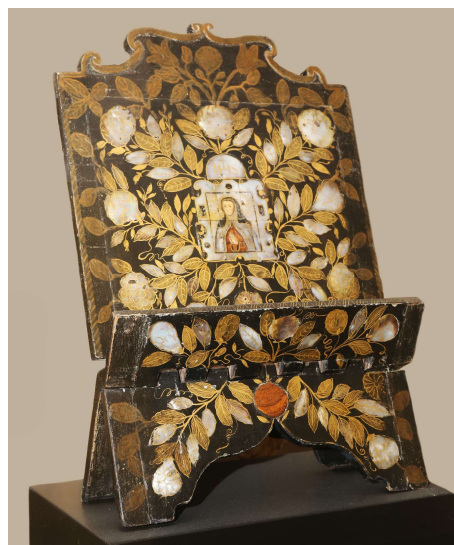

**Figura 13.** Atril del Museo Carmelitano de Alba de Tormes (Salamanca), enconchado y maque, segunda mitad del siglo XVII. Fotografía de José Luis Gutiérrez Robledo.

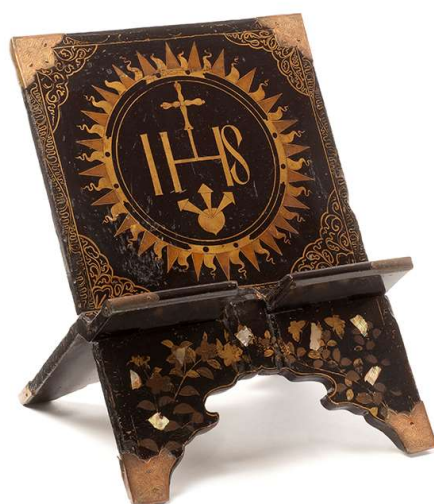

**Figura 14.** Atril de la parroquia de los Sagrados Corporales, Darroca (Zaragoza), laca Namban, 1580-1630. Fotografía de Rafael Suárez Pascual.

Se observan tres tipos diferentes de expresión para las hojas: hojas totalmente doradas, hojas de color anaranjado con los nervios y contornos dibujados con las pinceladas doradas, y hojas hechas de nácar con las mismas pinceladas encima. Los dorados son a base de polvo de oro muy fino aplicado muy densamente, y las hojas anaranjadas son resultado de aplicar el polvo de oro menos denso (Figuras 15 y 16). Es sorprendente que estas tres maneras de expresar las hojas son exactamente iguales que las técnicas aplicadas en la laca Namban. En japonés se distinguen con los términos *hira makie* (totalmente dorado plano), *enashiji* (anaranjado) y *raden* (nácar) (Figura 17). La manera de añadir los nervio o bordes se denomina *tsukegaki* (dibujos dorados añadidos). Hay que indicar que el atril enconchado no solo imita la forma, motivos y aspectos externos de un atril de laca Namban, sino también las técnicas aplicadas para expresar son muy similares. Sería razonable preguntarse si el artífice del atril enconchado tenía conocimientos técnicos de la decoración de la laca japonesa. Los motivos vegetales y florales son muy burdos si los comparamos con los motivos de la laca japonesa, y desde luego no salieron de las manos adiestradas de un artífice japonés.

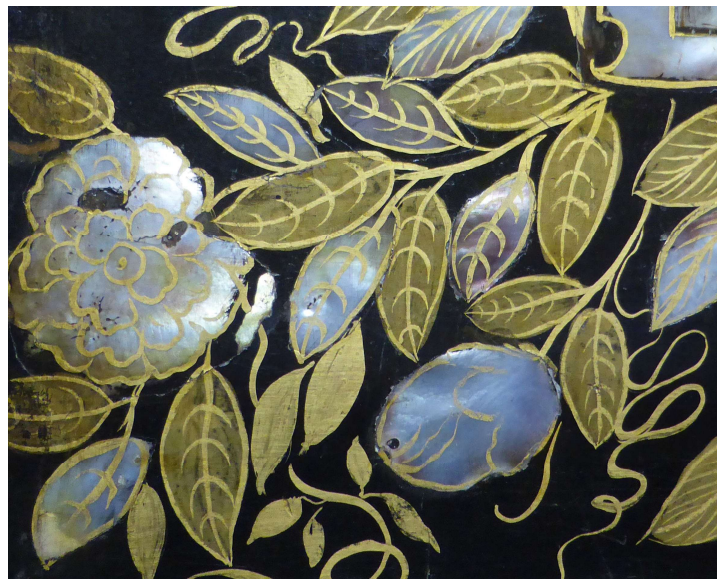

**Figura 15.** Detalle del atril anterior. Fotografía de Y. Kawamura.

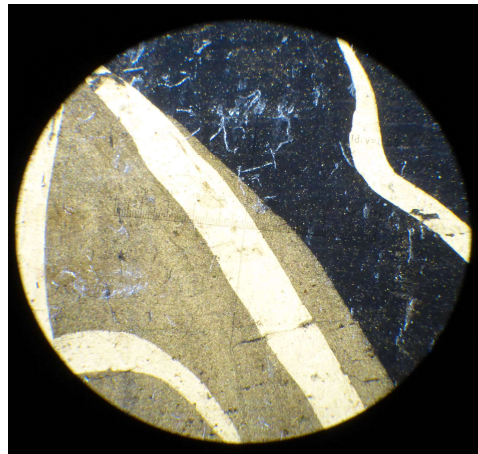

**Figura 16.** Detalle del atril anterior. Fotografía de Y. Kawamura.

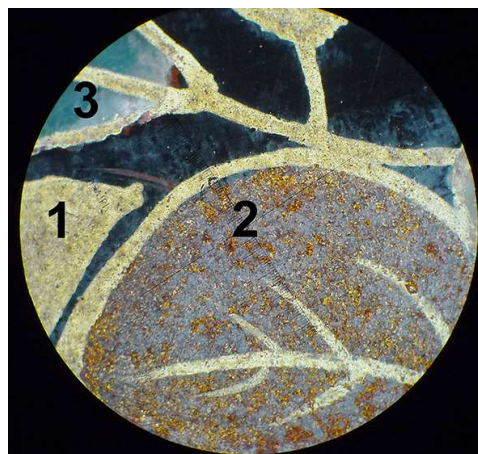

**Figura 17.** Detalle del arca de la parroquia de El Salvador, Pedroso (La Rioja), laca Namban, 1580-1630. Fotografía de Y. Kawamura. 1: *hira makie*. 2: *enashiji*. 3: *raden*. Líneas doradas encima del 2 y 3: *tsukegaki*.

Sin embargo, la excesiva semejanza en las técnicas de aplicar el polvo de oro en distintas densidades hace pensar la presencia de algún japonés no experto en la decoración

de laca japonesa, pero con suficiente conocimiento sobre el uso del polvo de oro y nácar en la laca. Es conocida la presencia de varios japoneses en Nueva España durante el siglo XVII. Sabemos que unos cuantos de los acompañantes que llegaron con el comerciante Tanaka en 1610, y con el samurái Hasekura (embajada Keicho) en 1614, y los comerciantes que cruzaron el Pacífico con fray Diego de Santa Catalina en 1617 no volvieron a Japón, y además seguramente algunos de los japoneses cristianos exiliados en Manila pudieron llegar a Nueva España [40]. Luis de Encío (Japón, 1595?-Guadalajara, 1666) y Juan de Páez (Osaka, 1608?-Guadalajara, 1675) constituyen los casos estudiados de los japoneses que vivieron en Guadalajara en esa centuria [40-42]. Por otro lado, ante la persecución cristiana, los artesanos con habilidades manuales, como artesanos de laca, eran los individuos que podían trasladarse del lugar de origen con mayor facilidad que los campesinos, que estaban muy atados a su tierra.

Al analizar este atril y compararlo con el sagrario de Allo, consideramos que el atril fue elaborado en una fecha más temprana que el sagrario por mostrar mayor cercanía a la laca Namban. En el sagrario sí se observan pinceladas doradas con polvo de oro, pero no se aprecia la aplicación de polvo de oro menos denso para el color anaranjado. Las hojas de este color están pintadas con la pintura de color semitransparente, alejándose de la técnica japonesa.

Respecto a la datación, nos basamos en la imagen de santa Teresa que figura dentro de un marco rectangular situado en el centro. La quebrada línea exterior del marco indica el estilo de la transición del manierismo al barroco o el primer barroco. Teniendo en cuenta que en Nueva España se prolonga la vigencia de este estilo, se podría barajar la fecha de mediados o segunda mitad del siglo XVII, con debida reserva por la falta de documentación. Su iconografía se gestó cuando se inició el proceso de su beatificación culminado en 1614, y después de su canonización en 1622 la imagen se difundió aún más. La figura de la santa es tipo orante, sin pluma ni libro, ni grandes gestos de transverberación o mortificación como el cuadro del pintor mexicano Cristóbal Villalpando en las últimas décadas del siglo (Museo de El Carmen, México), y la representa como “maestra de oración” siguiendo el retrato de la santa pintado por fray Juan de la Miseria en 1575 (Monasterio de las Carmelitas Descalzas de Sevilla) [43, 44]. Todo eso hace razonable pensar que la imagen de la santa fuese pintada en la segunda mitad del siglo XVII, fecha en que el atril de laca Namban era ya muy conocido en Nueva España. No nos olvidemos que el atril es un tipo de mueble de laca Namban que se conserva en un elevado número en la actualidad, por lo tanto, de gran producción en su día.

Tras este análisis de las obras de mueble enconchado, aún muy escaso en su número, se aprecia mayor cercanía a la laca Namban de este género que de la pintura enconchada, y este hecho nos indica probablemente que el mueble fuera ideado antes que la pintura.

De vuelta a la profesión de Tomás González. En 1689 figura como “maestro de pintor de maque” [32]. Tomás pudo representar una generación que hizo progresar el mueble de maque con nácar hacia la pintura enconchada. Las tablas enconchadas conocidas hasta ahora son pinturas elaboradas con óleo y temple, sin embargo, previo a estas pudieron existir obras hechas con el maque y el nácar, que correspondían a la profesión de Tomás [39] (p. 31). Por lo tanto, el atril puede ser el testigo, de momento el único, de esa fase previa: el maque enconchado. Por la fecha que barajamos para el atril, su autor pudo pertenecer a la generación de Tomás o algo anterior. Por otro lado, existe la posibilidad de que, si se analizan los materiales de todas las pinturas enconchadas, en algunas se detecte el maque.

Nuestra incógnita, sin embargo, continúa. ¿Por qué entre las obras de la laca mexicana que se conservan de la época virreinal no se conoce ninguna con nácar, excepto este atril? Esta ausencia del maque con nácar probablemente se debe al hecho de que la mayoría de las obras históricas que conocemos sean del siglo XVIII—excepto la laca de Periban datada en el siglo XVII—, y que con la llegada del ese siglo hubo un cambio de gusto. Como bien señala Ocaña [45], el estilo del maque mexicano del siglo XVIII tiene mucha



deuda a la moda europea de *chinoiserie* que empezó a reinar en dicho siglo en Europa y que se trasladaba a Nueva España.

Realmente el gusto por el nácar en la laca dejó de estar de moda ya a mediados del siglo XVII en Europa occidental (Holanda, Francia, Inglaterra, por ejemplo) y de hecho la laca de exportación japonesa de ese momento –principalmente destinada a los holandeses que estaban autorizados a mantener un reducido y controlado comercio con el Japón feudal– cambió su estilo. Esta producción, denominada del estilo pictórico, está decorada únicamente con el dorado *makie* y con una menor carga ornamental. Los talleres de laca de Europa central respondieron pronto a la influencia de la decoración dorada sobre el fondo negro, por ejemplo, en Berlín ya en 1690-1695 por Gérard Dagly [46, 47]. Otros trabajos de lacado que decoran los interiores, como Gabinete chino del Palacio Real de Turín (1734) o la Biblioteca Joanina de la Universidad de Coimbra (1720-30), constan de motivos dorados sobre fondo negro o rojo sin nácar.

La moda de *chinoiserie* llegó a España con los borbones, en concreto con Felipe V e Isabel de Farnesio. Su gusto por la laca sin nácar podemos apreciarlo en el *Chambre du lit* del Palacio Real de La Granja de San Ildefonso (1735), donde se aplicaron los paneles desmontados de los biombos chinos de múltiples colores, de estilo Coromandel, y sus imitaciones europeas. Este distanciamiento de la iridiscencia de nácar en la corte española también explicaría el cese de la llegada de los grandes paneles de pintura enconchada a España. Esto desencadenaría la recesión de la actividad artística novohispana y el cese del taller de los González. Los grandes paneles enconchados que conocemos, como las cinco series de La conquista de México, fueron encargados por la nobleza española como el conde de Galve o el conde de Moctezuma, ambos virreyes de Nueva España en la postrimería de los Austrias, y llegaron a España en los últimos años del reinado de Carlos II, el último monarca de los Habsburgo [39] (pp. 65, 69). Con la llegada de Felipe V, que trajo a España el gusto de la Francia del Versalles, el estilo artístico de la corte cambió drásticamente y en esta nueva situación parece que los paneles enconchados no tenían cabida [39] (pp. 55-56), aunque entendemos que en la sociedad novohispana seguía demandando esta propuesta artística por algún tiempo ya que existen pinturas enconchadas datadas en el siglo XVIII, como una *Virgen de Guadalupe* de colección particular con la fecha 1734 escrita<sup>vi</sup>[48] (pp. 60-61).

### 3.5. Otras prácticas combinadas con nácar

En el Museo de Navarra se conserva un arca de laca Namban de buena factura procedente del palacio de Guenduláin situado en Pamplona (Navarra) perteneciente a los marqueses de la Real Defensa, cuyo primer titular destacó por sus actividades militares en Cartagena de Indias. Resulta que en el arca se aprecian unas reparaciones antiguas. Los trozos de nácar desprendidos y perdidos fueron sustituidos por otros fragmentos de nácar de iridiscencia diferente o de forma de pecesito roto –un claro reaprovechamiento–, que son adheridos con un material oscuro y semitransparente, que podría ser el maque (Figura 18). En España no se conocen trabajos de nácar tallado en forma de peces, y teniendo en cuenta la larga tradición del arte de madreperla de Mesoamérica [49, 50], parece razonable pensar que fuera reparada en Nueva España. El artesano que la arregló pudo poseer el conocimiento de la laca mexicana y del enconchado.

Otro arca con el mismo tipo de reparación (colección particular) presenta unos fragmentos de nácar en forma de peces y unos retoques con pincelada de polvo de oro, que asemeja al mundo del enconchado (Figura 19). Estas reparaciones históricas parecen que nos hablan también de la actividad del maque unido al enconchado.

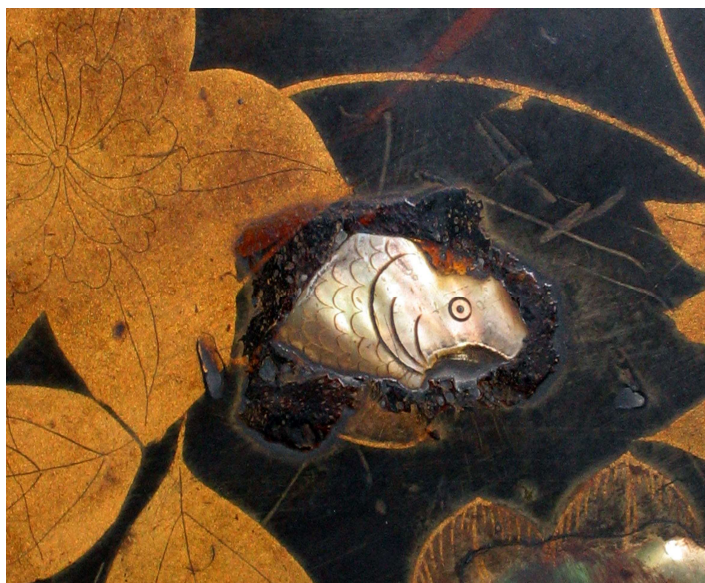

**Figura 18.** Detalle del arca del Museo de Navarra, laca Namban, 1580-1630. Fotografía de Y. Kawamura.

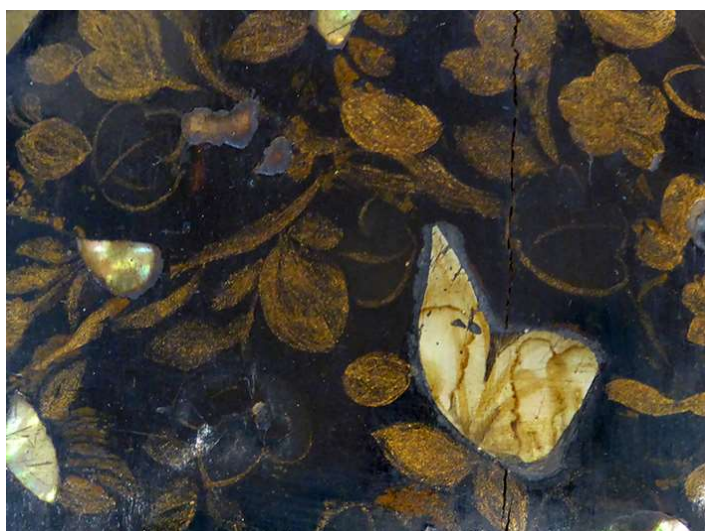

**Figura 19.** Detalle del arca de colección particular, laca Namban, 1580-1630. Fotografía de Y. Kawamura.

#### 4. Cruz del Nazareno de El Puerto de Santa María

En El Puerto de Santa María (Cádiz) se conserva una interesante y singular cruz (Figura 20), que pertenece a la Hermandad de Nuestro Padre Nazareno y Nuestra Señora de los Dolores, y procesiona cada Semana Santa sujeta por la imagen de Cristo de tamaño natural. No se conserva ninguna documentación que aclare la llegada de la cruz. Se trata de una cruz de grandes dimensiones: altura total 268 cm, brazos horizontales 170 cm y fondo 7 cm, pero de peso relativamente ligero puesto que son tablas montadas sobre unos bastidores por lo tanto hueca en su interior. Tanto en el anverso como en el reverso se encuentran trece escenas de la Pasión de Cristo y de la vida de la Virgen María respectivamente, y los marcos de esas escenas y los cantos están decorados profusamente con motivos vegetales. La factura a primera vista nos lleva al mundo virreinal novohispano<sup>vii</sup> [51, 52], y el uso original de la cruz pudo ser catequético y procesional para la evangelización de la población americana por parte de los misioneros [53].

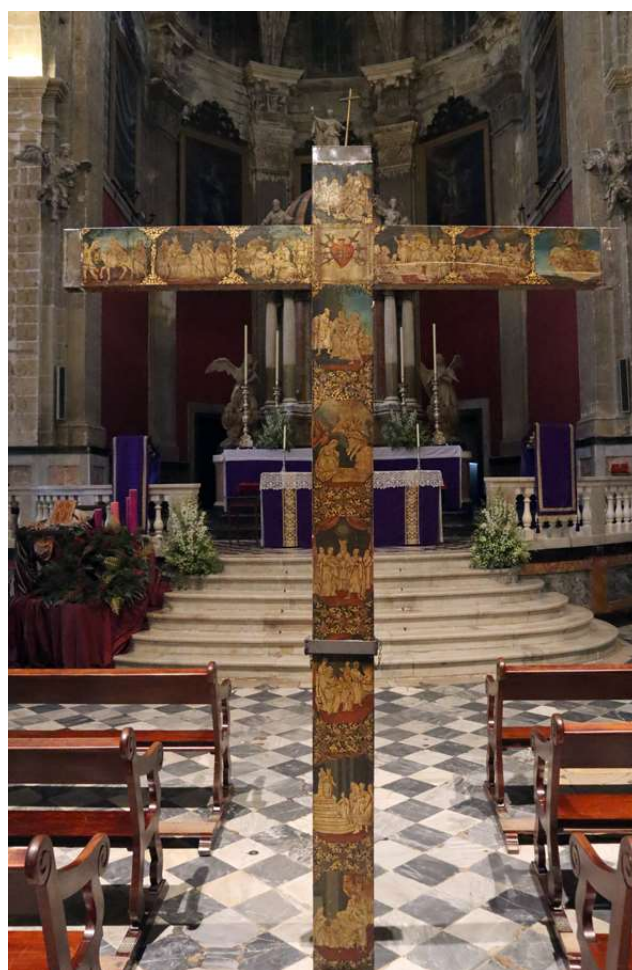

**Figura 20.** Cruz del Nazareno de la Hermandad de Nuestro Padre Nazareno y Nuestra Señora de los Dolores de El Puerto de Santa María (Cádiz), maque. Fotografía de Y. Kawamura.

El estudio del material ha revelado que es de *Cedro odorata*, cuyo hábitat se limita al Centroamérica [54]. Partiendo de este dato científico que indica que fue realizada en el virreinato de Nueva España, se realizó el estudio sobre su pintura. En la cruz se detectan por lo menos tres pintores intervinientes: uno (o incluso dos) para las escenas bíblicas, otro para la decoración de los marcos de esas escenas, y el tercero para la decoración de los cantos. Las tablas principales y las de los cantos fueron pintadas separadamente antes de ser montadas. Las veintiséis escenas ocupan unos rectángulos con las esquinas achaflanadas y separados entre sí. La manera de pintar es muy dibujística, basada en los grabados renacentistas que circulaban por Nueva España (Figura 21). Algunas escenas son casi idénticas a las de otras pinturas enconchadas. Especialmente la Presentación de la Virgen en el Templo es muy similar a dos obras del mismo título del Museo de América de Madrid (00132 y 00171) (Figura 22). E incluso, el singular templo con la escalera circular figura en una obra atribuida a los González, de colección particular (Figura 5). La mayoría de las escenas muestran una especial luminosidad que se debe principalmente a una capa de plata que está bajo la pintura, además de la aplicación de finas pinceladas doradas en distintas partes a modo de veladura [54].



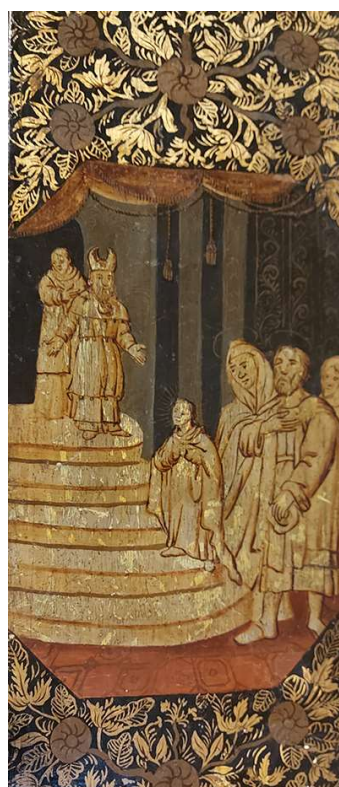

**Figura 21.** Detalle de la Cruz del Nazareno. Escena de la *Presentación de la Virgen en el Templo*. Fotografía de Ana García Barrios.

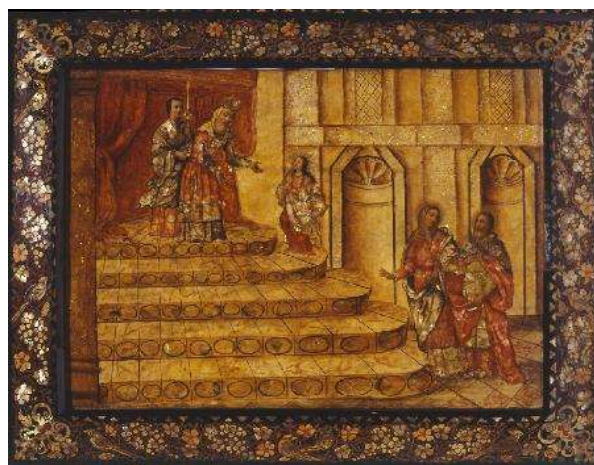

**Figura 22.** *Presentación de la Virgen en el Templo*, de la serie *Vida de la Virgen*, pintura enconchada. © Museo de América de Madrid.

El brillante aspecto de la cruz, sin embargo, se debe principalmente a las decoraciones vegetales que rodean las escenas, pintadas con oro sobre fondo negro brillante. El negro puede ser el maque puesto que en un extremo se aprecia una capa negra brillante, aplicada sobre una base blanca calcita y una capa rojiza, quizás de bol rojo (Figura 23). Este negro es comparable con el negro de las obras de maque del siglo XVIII, como el fondo de una bandeja cuadrada del Museo de Artes e Industrias Populares de Pátzcuaro (10-65-2206) (Figura 24). El dorado parece que es de polvo y pan de oro. Las imágenes ampliadas nos muestran el oro rugoso (Figura 25) que nos sugiere el pan de oro, probablemente adherido sobre los motivos trazados con algún adhesivo que podría ser el maque, pero en otras partes de la cruz se observan también pinceladas con polvo de oro. Aparte, finas partículas de oro se dispersan sobre la superficie.

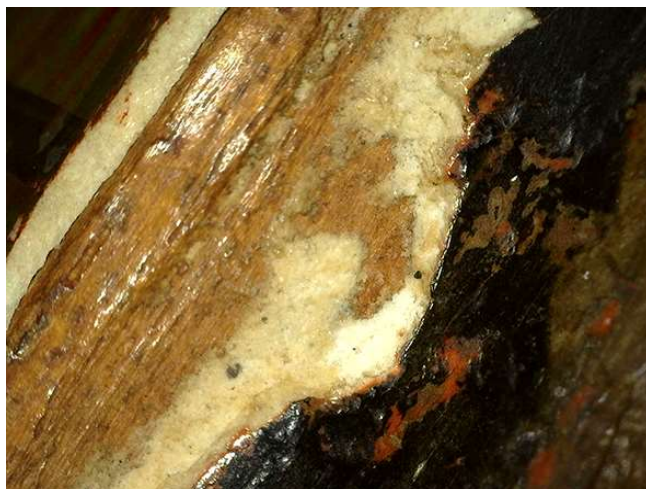

**Figura 23.** Detalle de la Cruz del Nazareno. Fotografía de Juan José Delgado Aguilera.

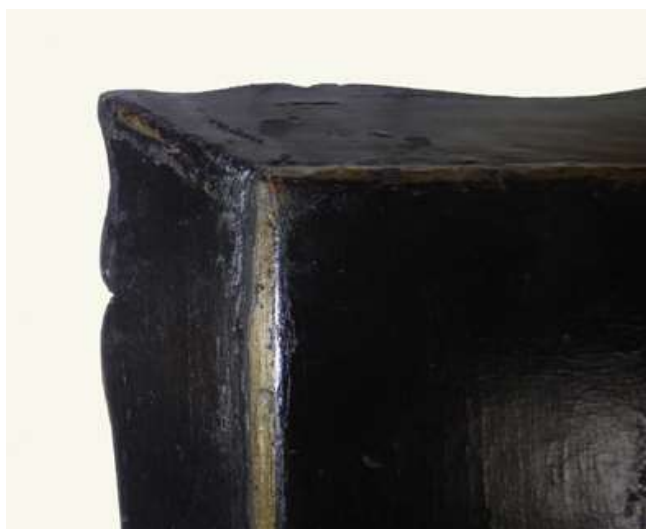

**Figura 24.** Detalle de la bandeja del Museo de Artes e Industrias Populares de Pátzcuaro, maque, siglo XVIII.. Fotografía de Y. Kawamura.

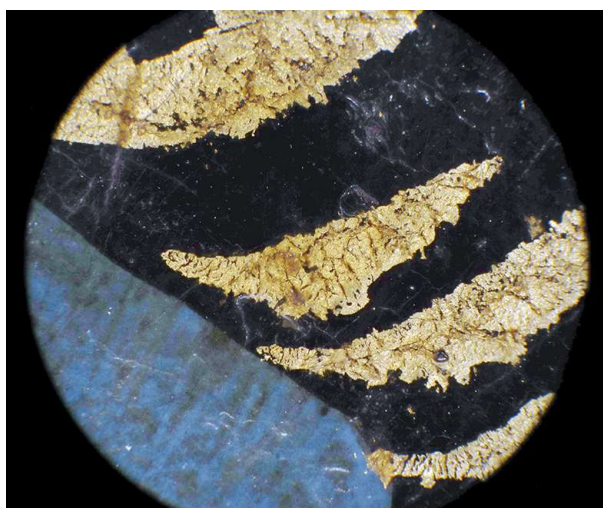

**Figura 25.** Detalle de la Cruz del Nazareno. Fotografía de Y. Kawamura.

Las hojas doradas están dibujadas solo remarcando los contornos y los nervios dejando ver el fondo negro en ellas, excepto pocas hojas totalmente doradas con los nervios pintados encima (Figura 26). Cinco flores de color crema rojizo, que recuerdan a las camelias, de tallos de aspecto torpe están dispuestas de manera totalmente simétrica. Un mismo esquema decorativo se repite a lo largo de la tabla vertical en ambos lados. En las decoraciones de la tabla horizontal (brazo corto de la cruz) solo figuran hojas con nervios dorados sobre fondo negro muy encajadas en unos espacios estrechos, debido a que en esta tabla se disponen de menos espacios entre las escenas. Es evidente que el pintor se limitó a decorar estas zonas marginales con un trabajo repetitivo copiando un modelo.

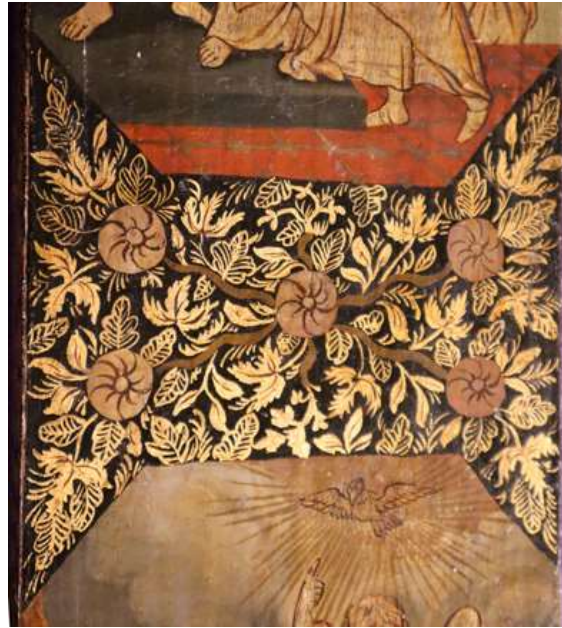

**Figura 26.** Detalle de la *Cruz del Nazareno*, panel vertical. Fotografía de Y. Kawamura.

En cuanto a las decoraciones en los cantos (Figura 27), los motivos constan de racimos de uvas y hojas de vid, claramente simbolizando el vino eucarístico y la sangre de Cristo, por lo tanto, no son meras decoraciones marginales sino obedecen a un programa iconográfico catequético. Aquí se alternan las hojas negras con nervios y contornos dorados y las enteramente doradas, pintadas con pinceladas sueltas y matizadas con algunos toques rojizos. Se aprecia la actuación de un pintor más instruido con mayor soltura en el manejo de pincel que en las tablas frontales. Lo que llama la atención es el tratamiento de las uvas, de una tonalidad clara cercana al gris matizado con el efecto plateado o perlado. Este color gris perlado puede conseguirse por la veladura de plata. Aunque en esta obra no se aplicó el nácar, este detalle nos recuerda poderosamente la incrustación de nácar de la laca Namban y del enconchado.

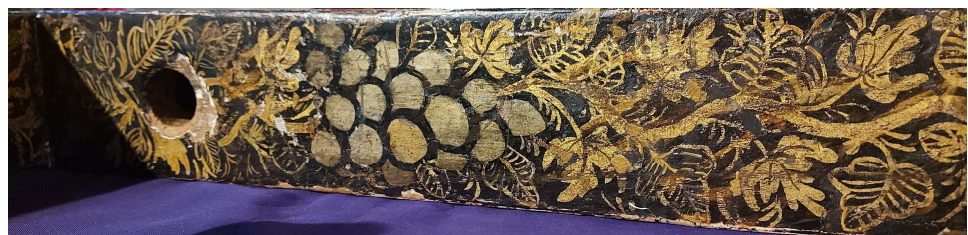

**Figura 27.** Detalle del canto la *Cruz del Nazareno*. Fotografía de Ana García Barrios.

Realmente, podemos establecer más paralelismos con estos dos artes. La aplicación del negro en el fondo, probablemente maque, combinado con los motivos dorados muy



tupidos es el estilo procedente de la laca Namban, asimilado en Nueva España, como se ha visto en el atril enconchado o en las zonas marginales de las pinturas enconchadas, como los marcos de los paneles de *La conquista de México*. El hecho de aparecer estos motivos en las zonas marginales es otro aspecto común con la pintura enconchada. Los motivos vegetales que figuran son los que también frecuentemente aparecen en la laca Namban: flores de camelia, racimos de uvas y hojas de vid. La única diferencia destacable es la ausencia del nácar en la cruz. Sin embargo, el aspecto pictórico que se logró expresar en las uvas nos lleva a pensar en la intención del pintor de imitar el nácar embutido de la laca Namban o del enconchado.

Cabe pensar que la *Cruz del Nazareno* fuera elaborada en una zona donde la práctica del nácar no existía, o en una época en que la práctica del enconchado se encontraba en recesión. La práctica del maque muy difundida en Michoacán, Guerrero, Oaxaca y Chiapas, sin usar el nácar según sabemos a través de las obras conservadas datadas del siglo XVIII, nos encaminaría a la producción de esta cruz en esas regiones a principios del siglo XVIII. La zona podría ser Michoacán por ser una zona de gran actividad del maque durante el virreinato como Pátzcuaro o Uruapan, sin descartar Chiapa de Corzo donde existe una importante tradición del maque y de las cruces decoradas. A pesar de nuestra indagación, aún no se ha localizado otra obra semejante en México.

## 5. Conclusiones

Es evidente que la laca Namban llegó a Nueva España a través del galeón de Manila y fue muy apreciada, por esta razón allí surgieron otras técnicas artísticas asociadas a este arte. La gran capacidad de asimilación y apropiación de lo foráneo y creación de algo original fue característica del virreinato americano. Por un lado, la laca mexicana de origen prehispánico recibió impulso con la llegada de la laca japonesa, la prueba de ello es la misma denominación “maque” –derivada de “makie” japonés–, puesto que tenemos la evidencia de que Sebastián Vizcaino a principios del siglo XVII llamaba a la laca japonesa “maqui”, como se ha mencionado anteriormente. Por otra parte, ya se habían señalado los influjos de la laca Namban en la pintura enconchada. Sin embargo, el mueble enconchado estaba hasta ahora sin recibir un merecido estudio. A través del análisis de las obras, consideramos que este género se desarrolló probablemente antes que la pintura enconchada. A pesar del escaso número de obras, el atril de Alba de Tormes, enconchado y muy probablemente de maque, es una obra fechable en la segunda mitad del siglo XVII por la forma del marco aún manierista o del primer barroco del retrato de la santa. Es sorprendente la semejanza de sus técnicas decorativas del dorado y de nácar a las de la laca japonesa. Por lo tanto, el atril de Alba de Tormes podría ser el primer eslabón del desarrollo del enconchado inspirado en la laca Namban, y el sagrario de Allo podría situarse en la siguiente fase de evolución.

Si Tomás González de Villaverde, padre de los pintores del enconchado Miguel y Juan González, practicaba el maque en 1689, es evidente que la pintura enconchada que tuvo gran desarrollo a finales del siglo XVII en la Ciudad de México surgió del ambiente artístico del maque. Aunque los González dejaron de aplicar el maque y lo sustituyeron por el óleo y temple, indudables huellas de la laca japonesa se aprecian en las zonas marginales de los paneles de los González y de otros de la misma época.

Otra fusión de la laca japonesa de estilo Namban con el maque se observa en la singular *Cruz del Nazareno* de El Puerto de Santa María. Los pintores que se encargaron de decorar las zonas marginales sobre fondo negro copiaron los motivos de la laca Namban y, aunque no aplicaron el nácar, parecen haber imitado su luminosa textura con los pigmentos. En este sentido la cruz de El Puerto de Santa María constituye un ejemplo muy singular que habla de otra fase de evolución del maque con influjos de la laca Namban en Nueva España.

A pesar de estas conclusiones, somos conscientes de que nuestro estudio se basa en un escaso número de obras y que debemos buscar más piezas de mueble enconchado para confirmarlas.

**Contribuciones de las autoras:** Conceptualización, Y. Kawamura y A. García Barrio; análisis e investigación del mueble enconchado, Y. Kawamura; análisis e investigación de la Cruz del Nazareno, A. García Barrio; redacción y preparación del texto original, Y. Kawamura and A. García Barrio; revisión para la edición, Y. Kawamura; consecución de las subvenciones, Y. Kawamura and A. García Barrio.

**Subvención:** Proyecto de Investigación I+D+i de la Agencia Estatal de Investigación del Gobierno de España, con referencia PGC2018-097694-B-I00 (2019-2022). Proyecto Puente de la Universidad Rey Juan Carlos N° V1252 (2023).

**Agradecimientos:** Nuestro agradecimiento a las colaboradoras de investigación en México: Sonia Ocaña de la Universidad Juárez Autónoma de Tabasco (México) y Rie Arimura de la Universidad Nacional Autónoma de México. Asimismo a los que facilitaron el estudio de las obras: Alicia Ancho, restauradora de la Dirección General de Cultura-Institución Príncipe de Viana (Pamplona, España); José Luis Gutiérrez Robledo de la Universidad Complutense de Madrid; Hermandad de Nuestro Padre Nazareno y Nuestra Señora de los Dolores de El Puerto de Santa María (Cádiz, España); Miguel Ángel Caballero, director de Patrimonio de El Puerto de Santa María; Juan José Delgado, responsable de restauración de El Puerto de Santa María; y David Calleja, concejal de cultura de El Puerto de Santa María. Igualmente, a los investigadores que han realizado el análisis de los materiales de la cruz de El Puerto: María Luisa Vázquez de Ágredos de la Universidad de Valencia (España); Mauro Bernabei del Consiglio Nazionale delle Ricerche (Italia); y Rocío Ortiz Calderón y Pilar Ortiz Calderón de la Universidad Pablo de Olavide (Sevilla, España).

Las autoras agradecen también a Toni Roberts y Clemency Connolly-Linden de la University College London (UCL) por la traducción del original español al inglés del artículo.

**Conflictos de intereses:** Las autoras declaran no tener conflictos de interés.

#### Notas:

<sup>1</sup> La luz del nácar. Reflejo de Oriente en México. Exposición comisariada por Ana Zabia de la Mata, conservadora responsable del Departamento de América Virreinal del Museo de América de Madrid (España). Del 24 de noviembre de 2022 al 25 de mayo de 2023.

<sup>1</sup> Archivo General de Indias, Filipinas, 20, R. 6, N. 44. Carta del oidor Juan de la Vega a Ruiz Contreras sobre regalo enviado. Manila, 16 de julio de 1612.

<sup>1</sup> Archivo General de Indias, Filipinas, 339, L. 2, F. 284v. Real Cédula, 1604; Filipinas, 60, N. 12. Informaciones de oficio, 1611; Archivo parroquial de Pedroso, Libro de aniversarios y missas perpetuas y de los bienes que competen al beneficio y fábrica desta yglesia de St. Salvador desta villa de Pedroso, f. 132 v.

<sup>1</sup> Los ejemplos son: el altar portátil del Museo Nacional de Tokio con la imagen de San Esteban elaborada con la plumaria de Nueva España, otro del Museo Nacional de Kyoto con la iconografía de la Trinidad Triándrica, iconografía usada solo en Nueva España; otro del Museo Nacional de Artes Decorativas de Madrid con la imagen de san Fernando del estilo virreinal novohispano.

<sup>1</sup> Se han debatido mucho sobre las relaciones familiares de Miguel y Juan González. Las últimas noticias confirman que eran hermanos (información facilitada por la Dra. Sonia Ocaña, a quien manifestamos nuestro agradecimiento).

<sup>1</sup> Es la obra más tardía que se conoce en este momento.

<sup>1</sup> Los primeros estudios fueron realizados por Suárez Ávila y González Luque. Después de estos estudios, García Barrios inició una investigación académica en el año 2016.

## Referencias

- Ocaña Ruiz, S. Los marcos ‘enconchados’ y las lacas japonesas namban: apropiación de un repertorio formal. In *Orientes y Occidentes: El Arte y la Mirada del Otro*, Curiel, G. Ed.; Universidad Nacional Autónoma de México/IIIE: México DF, México, 2007; pp. 503-531, ISBN 9703243681.
- Ocaña Ruiz, S. Marcos ‘enconchados’: autonomía y apropiación de formas japonesas en la pintura novohispana. *Anales del Instituto de Investigaciones Estéticas* 2008, XXX (92), 107-153, doi: <https://doi.org/10.22201/iiie.18703062e.2008.92.2262>.
- Ocaña Ruiz, S. Enconchado frames: The Use of Japanese Ornamental Models in New Spanish Painting. In *Asia & Spanish America. Trans-Pacific Artistic & Cultural Exchange 1500-1850*, Donna D., Otsuka R, Eds.; Denver Museum, Denver, CO, USA, 2009; pp. 129-149, ISBN 978-8061-9972-3.
- Fróis, L.; Pinto, J.A.A.; Okamoto, Y.; Bernard, H. *La première ambassade du Japon en Europe, 1582-1592*; Sophia University: Tokyo, Japan, 1942; pp. 113-114.
- Kawamura, Y. Coleccionismo y colecciones de la laca extremo oriental en España desde la época del arte Namban hasta el siglo XX. *Artígrama* 2003, 18, 211- 230, <http://www.unizar.es/artigrama/pdf/18/2monografico/09.pdf>.
- Kawamura, Y.; Ancho, A.; Balduz, B. *Laca Namban. Brillo de Japón en Navarra*; Gobierno de Navarra: Pamplona, Spain, 2016, ISBN 978-84-235-3408-1.
- Boyer, M. *Japanese Export Lacquers from the Seventeenth Century in the National Museum of Denmark*; National Museum: Copenhagen, Denmark, 1959.
- Arakawa, H. *Namban shitsugei*; Bijutsushuppansha: Tokyo, Japan, 1971.
- Haino, A. *Kinsei no makie*; Chûôkôronsha: Tokyo, Japan, 1994, ISBN 4-12-101196-1.
- Yamazaki, T., *Umi o watatta nihon no shikki I (16 -17 seiki) (Nihon no bijutu 426)*; Shibundô: Tokyo, Japan, 2001, ISBN 4-7843-3426-2.
- Impey, O.; Jörg, C. *Japanese Export Lacquer*; Hotei Publishing: Amsterdam, Netherlands, 2005, ISBN 90-74822-72X.
- Hidaka, K. *Ikoku no Hyôshô*; Brücke: Tokyo, Japan, 2008, ISBN 978-4-434-11660-5.
- Nagashima, M. Export Lacquer: Reflexion of the West in Black and Gold *Makie*. In *Japan. Export Laquer: Reflection of the West in Black and Gold Makie*, Kyoto National Museum, Ed.; The Yomiuri Shimibun: Osaka, Japan, 2008; pp. 30-48.
- Kawamura, Y. Laca japonesa urushi de estilo Namban en España. Vías de su llegada y sus destinos. In *Laca Namban. Huella de Japón en España. IV Centenario de la Embajada Keichô*, Kawamura, Y. Ed.; Fundación Japón-Ministerio de Educación, Cultura y Deporte: Madrid, Spain, 2013; pp. 249-296, ISBN 978-84-8181-540-5.
- Morga, A.; Hidalgo Nuchera, P. *Sucesos de las Islas Filipinas*; Polifemo: Madrid, Spain, 1997, ISBN 978-84-86547-37-0.
- Romero de Terreros, M. Relación del Japón (1609), por Rodrigo de Vivero y Velasco. Introducción y notas. *Anales del Museo Nacional de México* 1934, 1, 67-111. Transcription of a copy preserved in the Real Academia de Historia de España, Madrid, Spain.
- Gil, J. *Hidalgos y samurais. España y Japón en los siglos XVI y XVII*; Alianza Editorial: Madrid, Spain, 1991, ISBN 9788420626758.
- Tremml, B.; Sola, E. Una relación de Japón de 1614 sobre el viaje de Sebastián Vizcaino. *Archivo de la Frontera*, 2013, [archivodelafrontera.com/wp-content/uploads/2013/11/Relación-del-viaje-de-Sebastián-Vizcaino-1612-1614.pdf](http://archivodelafrontera.com/wp-content/uploads/2013/11/Relación-del-viaje-de-Sebastián-Vizcaino-1612-1614.pdf).
- Kawamura, Y. Manila, ciudad española y centro de fusión. Un estudio a través del inventario del gobernador de Filipinas Alonso Fajardo de Tenza (1624). *E-Spania. Quelle histoire globale au XVIe siècle ? / Fronteras de Ultramar* 2018, 30, 1-13, <https://journals.openedition.org/e-spania/27950>.
- Ballesteros Flores, T. B. *Entre el ser y el parecer. Los objetos suntuarios orientales en el ajuar doméstico de mercaderes del Consulado de la Ciudad de México (1573-1700)*. Doctoral Thesis, Universidad Nacional Autónoma de México, Mexico, 2007. [https://repositorio.unam.mx/contenidos/entre-el-ser-y-el-parecer-los-objetos-suntuarios-orientales-en-el-ajuar-domestico-de-mercaderes-del-consulado-de-la-ciud-200846?c=pQkkLz&d=false&q=\\*&i=2&v=0&t=search\\_0&as=0](https://repositorio.unam.mx/contenidos/entre-el-ser-y-el-parecer-los-objetos-suntuarios-orientales-en-el-ajuar-domestico-de-mercaderes-del-consulado-de-la-ciud-200846?c=pQkkLz&d=false&q=*&i=2&v=0&t=search_0&as=0)
- Ocaña, S.; Arimura, R. Japanese objects in New Spain. Nanban Art and Beyond. *Colonial Latin American Review* 2022, 31:3, 327-353. <https://doi.org/10.1080/10609164.2022.2104033>.
- Prieto Ustio, E. Objetos asiáticos en ajuares novohispanos. El testimonio de los inventarios en las primeras décadas del seiscientos. In *El viaje más largo. Proyecciones de la primera vuelta al mundo*, Martínez de Salinas Alonso, M.L.; Martínez, M.C.; Porro Gutiérrez, J.M. Coords.; Universidad de Valladolid, Valladolid, Spain. 2022. pp. 147-164.
- Kawamura, Y. Obras de laca Namban en España. Síntesis de la globalización bajo la monarquía hispánica. In *Arte y globalización en el mundo hispánico de los siglos XV al XVII*, Parada López de Corselas, M., María Palacios Méndez, L.M., Eds.; Universidad de Granada: Granada, Spain, 2020; pp. 531-550, ISBN 978-84-338-6664-6.
- Baena Zapatero, A. Apuntes sobre la elaboración de biombos en la Nueva España. *Archivo español de arte* 2015, 350, 173-188. <https://doi.org/10.3989/aearte.2015.11>
- Baena Zapatero, A. Biombos mexicanos e identidad criolla. *Revista de Indias* 2020, 280, 651-686. <https://doi.org/10.3989/revindias.2020.018>
- Pérez Carrillo, S. *La laca mexicana. Desarrollo de un oficio artesanal en el virreinato de la Nueva España durante el siglo XVIII*; Alianza Editorial: Madrid, Spain, 1990, ISBN 84-206-9044-9.
- Medina, I. ¿Maque prehispánico? Una antigua discusión. In *Lacas mexicanas, Ciudad de México*, Museo Franz Mayer y Artes de México: México DF, Mexico, 2003; pp. 21-30.
- Ocaña Ruiz, S. Enconchados: Japão, Nova Espanha, mestiçagens artísticas e os González. In *As Américas em perspectiva: das conquistas às independências*, Editora UFJF: Juiz de Fora, Brasil, 2023; pp. 52-69. ISBN: 978-65-89512-95-0



- <https://www2.ufjf.br/cliodel/wp-content/uploads/sites/75/2023/09/As-Americas-em-perspectiva-das-Conquistas-as-Independencias.pdf>
29. Ocaña Ruiz, S. "Early Modern Artistic Globalization from Colonial Mexico. The Case of *Enconchados*". In *The Routledge Companion to Global Renaissance Art*, Stephen J. Campbell, Stephanie Porras, eds., Routledge, New York, 2024, pp. 52-66. eBook ISBN: 9781003294986 <https://doi.org/10.4324/9781003294986>
  30. Toussaint, M. La pintura con incrustaciones de concha nácar en Nueva España. *Anales del Instituto de Investigaciones Estéticas* 1952, 5(20), 5-20.
  31. Rivero Lake, R. *El arte Namban en el México*; Turner: México DF, Mexico, 2005, ISBN 9788475066929.
  32. Tovar, G. Documentos sobre 'enconchados' y la familia de los González. *Cuadernos de Arte Colonial* 1986, 1, 97-103, <https://www.culturaydeporte.gob.es/museodeamerica/dam/jcr:72b3223c-b8ce-4b41-ba1e-0094f2df5467/art-culo-5.pdf>.
  33. Ocaña, S. Nuevas reflexiones sobre las pinturas incrustadas de conchas y el trabajo de Juan y Miguel González. *Anales del Instituto de Investigaciones Estéticas* 2013, 35(102), 125-176, doi: <https://doi.org/10.22201/iee.18703062e.2013.1.2490>.
  34. Kawamura, Y. La pintura en los reversos de los enconchados de la conquista de México de la antigua colección de los duques de Moctezuma. In *La luz del nácar. Reflejo de Oriente en México*, Zabía de la Mata, A. Ed.; Ministerio de Cultura y Educación: Madrid, Spain, 2022, pp. 83-92.
  35. García Gainza M.C. Dir. *Catálogo Monumental de Navarra. II. Merindad de Estella*, vol. I, Institución Príncipe de Viana, Universidad de Navarra, Gobierno Foral de Navarra: Pamplona, Spain, 1982, p. 115
  36. Heredia, M.C.; Orbe Sivatte, M.; Orbe Sivatte A. Sagrario. In *Arte hispanoamericano en Navarra. Plata, pintura y escultura*; Gobierno de Navarra: Pamplona, Spain, 1992; p. 236, cat. 172.
  37. García Sáiz, M.C. Sagrario. In *Los Siglos de Oro en los Virreinos de América 1550-1700*, Bérchez, J.; Alcalá, L.E., Eds.; Sociedad Estatal de para la Conmemoración de los Centenarios de Felipe II y Carlos V: Madrid, Spain, 1999; pp. 382-383, cat. 134.
  38. Dijovne, M. Enconchados mexicanos en el Museo Nacional de Bellas Artes. In *Los enconchados de la conquista de México: Colección Museo Nacional de Bellas Artes*; Museo Nacional de Bellas Artes-Secretaría de Patrimonio Cultural: Ciudad Autónoma de Buenos Aires, Argentina, 2021, ISBN 978-950-9864-20-7. [https://media.bellasartes.gob.ar/h/Publicaciones/cat\\_enconchados.pdf](https://media.bellasartes.gob.ar/h/Publicaciones/cat_enconchados.pdf)
  39. Zabía de la Mata, A. *La luz del nácar. Reflejo de Oriente en México*, Ministerio de Cultura y Deporte: Madrid, Spain, 2022, ISBN 978-84-8181-810-9.
  40. Falck Reyes, M.; Palacio, H. *El japonés que conquistó Guadalajara. La historia de Juan de Páez en la Guadalajara del siglo XVII*; Universidad de Guadalajara: Guadalajara, Mexico, 2009, ISBN 9781449267292.
  41. Calvo, T. Japoneses en Guadalajara: 'Blancos de Honor' durante el Seiscientos mexicano. In *La Nueva Galicia en los siglos XVI y XVII*, Calvo, T.; Castañeda, C., Eds.; El Colegio de Jalisco, Centro de Estudios Mexicanos y Centroamericanos: Guadalajara, Mexico, 1989; pp. 159-171, ISBN 9789686142044.
  42. Calvo, T. *Guadalajara y su región en el siglo XVII: población y economía*, Centro de Estudios Mexicanos y Centroamericanos, Ayuntamiento de Guadalajara: Guadalajara, Mexico, 1992, OCLC 1025798795.
  43. Moreno, F. Iconografía de los testigos de los procesos teresianos. A propósito de Adrian Collaert y la escenografía de la capilla Cornaro. *Archivo Español de Arte* 2014, 345, 29-44, doi: 10.3989/aearte.2014.03.
  44. Cuesta, L.J. ¿Una nueva iconografía? Santa Teresa en el arte novohispano. *Hipogrifo* 2016, 4.2, 7-18, doi: <http://dx.doi.org/10.13035/H.2016.04.02.02>.
  45. Ocaña, S. De Asia a la Nueva España vía Europa: lacas asiáticas y achinadas en el siglo XVIII. *Anales del Instituto de Investigaciones Estéticas* 2017, 39(111), 1131-186, doi: <http://dx.doi.org/10.22201/iee.18703062e.2017.111.2611.I>
  46. Strasse, M.H. (ed.) *Lacquer art from East Asia and Europe. Ex oriente lux. The Herbig-Haarhaus lac. The Herbig-Haarhaus lacquer museum*; BASF Colors and Fibers AG: Cologne, Germany, 1979.
  47. Kopplin, M. *Gérard Dagly: Und die Berliner Hofwerkstatt*; Hirmer Verlag GmbH: Munich, Germany, 2015.
  48. Dujovne, M. *Las pinturas con incrustaciones de nácar*; UNAM, Ciudad de México, Mexico, 1984. ISBN: 978-968-58-0457-8.
  49. Castelló Yturbide, T. Coord. *La concha de nácar en México*, Grupo Gutsa: México DF, Mexico, 1990.
  50. Suárez Díez, L. *Conchas y caracoles. Ese universo maravilloso*; Instituto Nacional de Antropología e Historia: México DF, Mexico, 2007, ISBN 9789680301300.
  51. Suárez Ávila, L. Habitantes y gente de El Puerto de Santa María. *Nótula* 2010, 2079, <http://www.gentedelpuerto.com/2014/04/15/2-079-hermandad-del-nazareno-estrenode-una-nueva-imagen-del-cristo/>.
  52. González Luque, F. *La Hermandad de Jesús Nazareno de El Puerto de Santa María. Estudio histórico y artístico*; Hermandad de Nuestro Padre Jesús Nazareno y Nuestra Señora de los Dolores de El Puerto de Santa María: El Puerto de Santa María, Cádiz, Spain, 2017.
  53. García Barrios, A. Laca asiática y color mexicano en la cruz del Nazareno de El Puerto de Santa María (Cádiz, España). *Arqueología Mexicana* 2023, 178, 76-81.
  54. García Barrios, A.; Vázquez de Ágredos, M.; Bernabei, M.; Ortiz Calderón, R.; Ortiz Calderón, P.; Delgado Aguilera, J.J. Mexican colors in the cross of the Nazarene in El Puerto de Santa María, Cádiz, Spain. In *Drugs and Colors in History*. Editorial Tirant lo Blanch Humanidades: Valencia (in press).

**Disclaimer/Publisher's Note:** The statements, opinions and data contained in all publications are solely those of the individual author(s) and contributor(s) and not of MDPI and/or the editor(s). MDPI and/or the editor(s) disclaim responsibility for any injury to people or property resulting from any ideas, methods, instructions or products referred to in the content.
